# Supplementary material
Source: Springer Nature journal article supplement (https://www.springermedizin.de/resource/supplementary/12969_2010_423_MOESM2_ESM.pdf/9593016)
Supplement: MOESM2 [file 9593016]

| Determinant                       | Promotes                                        | Obstructs                       |
|-----------------------------------|-------------------------------------------------|---------------------------------|
| Income                            | > 200% federal poverty level (FPL) <sup>‡</sup> | 100-200% FPL (“near poor”)      |
| Race                              | White                                           | Minority status or ethnicity    |
| Transportation                    | Reliable                                        | Inadequate                      |
| Parental education                | High school diploma or higher                   | Failure to complete high school |
| Patient age                       | 2-5 or 13-17 year olds                          | 6-12 year olds                  |
| Geographic proximity <sup>*</sup> | Urban location                                  | Distant location                |
| Medical insurance <sup>†</sup>    | Present                                         | Absent or under-insured         |
| Cultural or language differences  | Absent                                          | Present                         |

\* Geographic proximity to care does not invariably lead to access.

† Although coverage improves the likelihood of access, it is not a guarantee.

‡ Gross annual income for family of 2 at 100% FPL: in lower 48 states & DC = \$14,710; in AK = \$18,380; in HI = \$16,930. [4]
